# Supplementary material for: Efficient hydrogenation of aromatic aldehydes to corresponding benzyl alcohols over Ni–B/MIL-101
Source: Royal Society of Chemistry journal article supplement (doi:10.1039/c4ra01369g), 2014-01-01
Supplement: c4ra01369g1.pdf [file c4ra01369g1.pdf]

## Efficient hydrogenation of aromatic aldehydes to corresponding benzyl alcohols over Ni-B/MIL-101

Xiangjin Kong\*, Junhai Liu

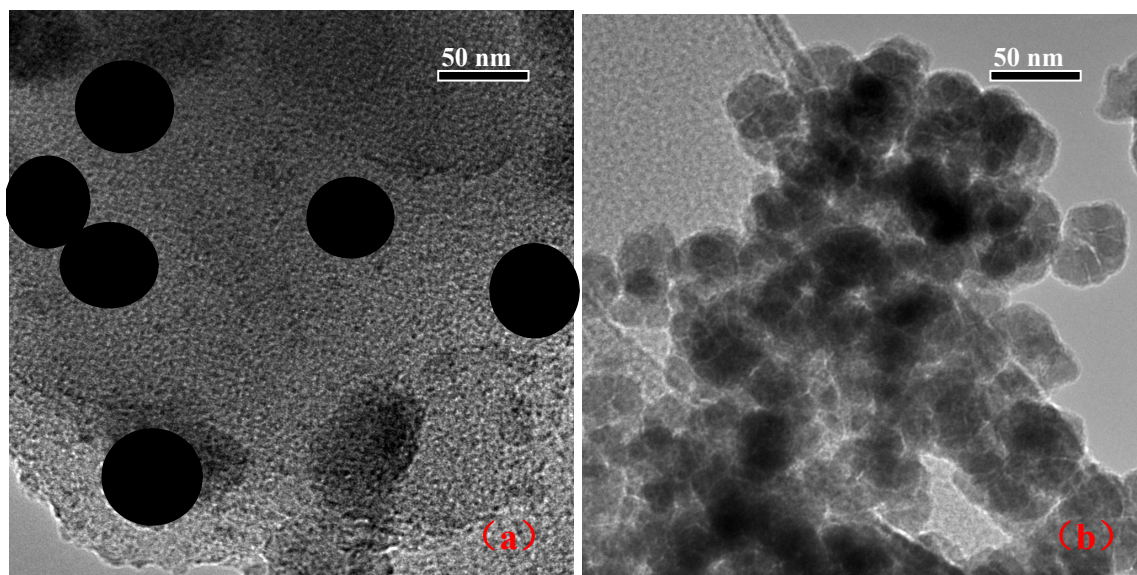

Fig.S1 (a) Ni-B/MIL-101 and (b) Ni-B/SiO<sub>2</sub>

Table S1 The characterized results of Pd/Al<sub>2</sub>O<sub>3</sub>

| Sample       | surface area (m <sup>2</sup> /g) | Pore volume(cm <sup>3</sup> /g) | Pd loading <sup>a</sup> (wt%) | Particle size <sup>b</sup> (nm) | Pd dispersion <sup>c</sup> (%) | Binding energy <sup>d</sup> (eV) |
|--------------|----------------------------------|---------------------------------|-------------------------------|---------------------------------|--------------------------------|----------------------------------|
| Ni-B/MIL-101 | 145.2                            | 0.44                            | 0.48                          | 7.8 ± 2.3                       | 12.8                           | 335.4                            |

<sup>a</sup> Loading of palladium on the catalyst is measured by ICP-AES,

<sup>b</sup> Particle size of palladium is derived from TEM,

<sup>c</sup> Calculated from the H<sub>2</sub>-chemisorption,

<sup>d</sup> Binding energy of palladium is characterized by XPS.

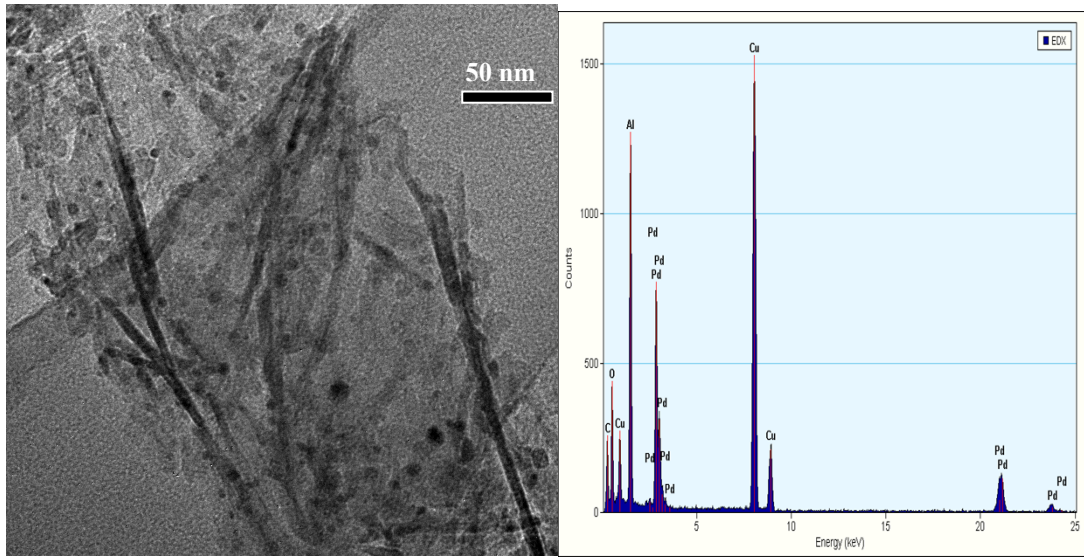

Fig. S2 The TEM image and EDX spectra of Pd/Al<sub>2</sub>O<sub>3</sub>

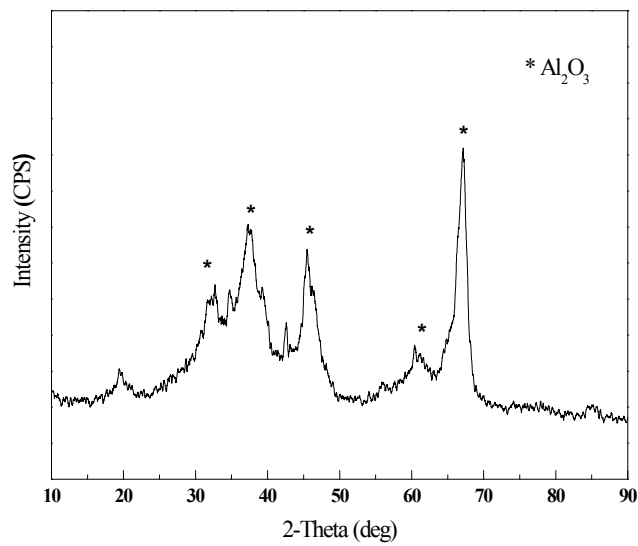

Fig. S3 The XRD patterns of Pd/Al<sub>2</sub>O<sub>3</sub>

Al<sub>2</sub>O<sub>3</sub> phase are observed, while no visible Pd phase can be observed from the XRD patterns of Pd/Al<sub>2</sub>O<sub>3</sub> due to the fact that Pd was either well dispersed or had a low content on the support.

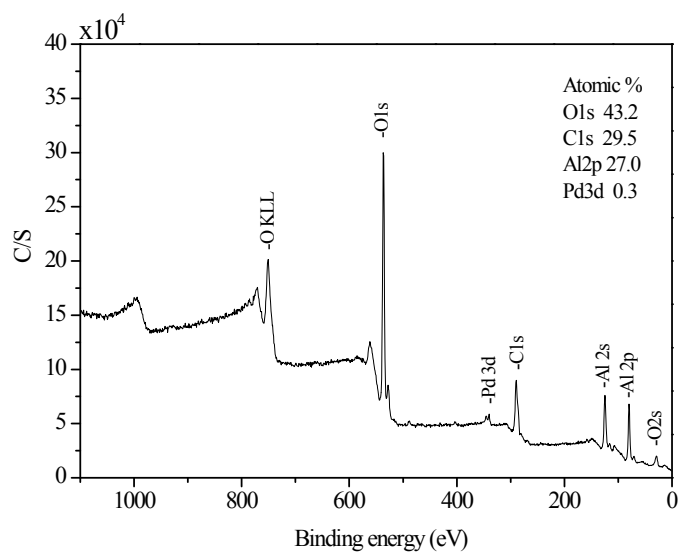

Fig. S4 XPS spectra of Pd/Al<sub>2</sub>O<sub>3</sub>

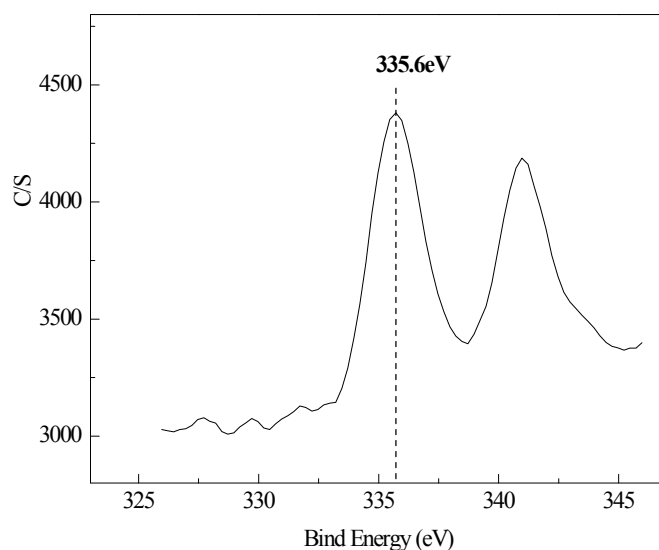

Fig. S5 Pd 3d XPS spectra of Pd/Al<sub>2</sub>O<sub>3</sub>

Table S2 The catalytic performance of the catalysts

| Catalyst                          | Conversion/% | Selectivity / %   |         |                |       |
|-----------------------------------|--------------|-------------------|---------|----------------|-------|
|                                   |              | Methylcyclohexane | Toluene | Benzyl alcohol | Other |
| Pd/Al <sub>2</sub> O <sub>3</sub> | 92.2         | 45.2              | 37.2    | 20.6           | 1.0   |
| Ni-B/SiO <sub>2</sub>             | 46.0         | 2.5               | 13.5    | 75.4           | 8.6   |
| Ni-B/MIL-101                      | 90.0         | 0.0               | 0.0     | 98.5           | 1.5   |

Reaction conditions: reaction temperature (80 °C), catalyst amount (1.3mmol, based on the metal species), substrate (30mmol), methanol (100 mL), hydrogenation pressure (1.5MPa), reaction time (2h).

Table S3 The influence of temperature on the reaction

| Temperature<br>°C | Conversion/% | Selectivity / %   |         |                |       |
|-------------------|--------------|-------------------|---------|----------------|-------|
|                   |              | Methylcyclohexane | Toluene | Benzyl alcohol | Other |
| 60                | 74.0         | 0.0               | 0.0     | 96.5           | 3.5   |
| 80                | 90.0         | 0.0               | 0.0     | 98.5           | 1.5   |
| 100               | 100.0        | 0.0               | 0.0     | 99.4           | 0.6   |
| 120               | 100.0        | 0.0               | 3.2     | 96.0           | 0.8   |
| 200               | 100.0        | 0.0               | 15.5    | 82.0           | 2.5   |
| 260               | 100.0        | 0.0               | 30.1    | 66.5           | 2.4   |
| 280               | 92.0         | 0.0               | 45.1    | 52.6           | 2.3   |
| 300               | 80.2         | 0.0               | 53.1    | 44.5           | 2.4   |
| 320               | 55.0         | 0.0               | 64.4    | 33.3           | 2.3   |
| 340               | 20.0         | 2.0               | 75.3    | 18.5           | 5.2   |

Reaction conditions: catalyst amount (1.3mmol, based on the metal species), substrate (30mmol), methanol (100 mL), hydrogenation pressure (1.5MPa), reaction time (2h).

Thus, 100°C was chosen to be the best reaction temperature for the present reaction.

Table S4 The influence of hydrogenation pressure on the reaction

| Pressure/ MPa | Conversion/% | Selectivity / %   |         |                |       |
|---------------|--------------|-------------------|---------|----------------|-------|
|               |              | Methylcyclohexane | Toluene | Benzyl alcohol | Other |
| 1             | 96.8         | 0.0               | 0.0     | 98.8           | 1.2   |
| 1.5           | 100.0        | 0.0               | 0.0     | 99.4           | 0.6   |
| 2             | 100          | 0.8               | 1.2     | 97.5           | 0.5   |
| 3             | 100          | 2.4               | 8.4     | 88.6           | 0.6   |

Reaction conditions: reaction temperature (100°C), catalyst amount (1.3mmol, based on the metal species), substrate (30mmol), methanol (100 mL), reaction time (2h).

Thus, 1.5 MPa was chosen to be the best hydrogen pressure for the present reaction.

Table S5 The influence of reaction time on the reaction

| Reaction time<br>/ h | Conversion/% | Selectivity / %   |         |                |       |
|----------------------|--------------|-------------------|---------|----------------|-------|
|                      |              | Methylcyclohexane | Toluene | Benzyl alcohol | Other |
| 1                    | 86.5         | 0.0               | 0.0     | 98.0           | 2.0   |
| 1.5                  | 95.6         | 0.0               | 0.0     | 98.8           | 1.2   |
| 2                    | 100.0        | 0.0               | 0.0     | 99.4           | 0.6   |
| 2.5                  | 100.0        | 0.4               | 5.6     | 93.5           | 0.5   |

Reaction conditions: reaction temperature (100°C), catalyst amount (1.3mmol, based on the metal species), substrate (30mmol), methanol (100 mL), hydrogenation pressure (1.5MPa).

Thus, 2 h was chosen to be the best reaction time for the present reaction.

Table S6 The influence of Ni precursor on the reaction

| Ni precursor      | Conversion/% | Selectivity / %   |         |                |       |
|-------------------|--------------|-------------------|---------|----------------|-------|
|                   |              | Methylcyclohexane | Toluene | Benzyl alcohol | Other |
| NiCl              | 100.0        | 0.0               | 0.0     | 99.4           | 0.6   |
| NiNO <sub>3</sub> | 100.0        | 0.0               | 0.0     | 91.6           | 8.4   |

Reaction conditions: reaction temperature (100°C), catalyst amount (1.3mmol, based on the metal species), Substrate (30mmol), methanol (100 mL), hydrogenation pressure (1.5MPa), reaction time (2h).

All in all, as can be found, the conversion of benzaldehyde and selectivity towards toluene reached to 100.0% and 99.3% at the optimum conditions (reaction temperature (80°C), catalyst amount (1.3mmol, based on the metal species), substrate (30mmol), methanol (100 mL), hydrogenation pressure (1.5MPa), reaction time (2h))

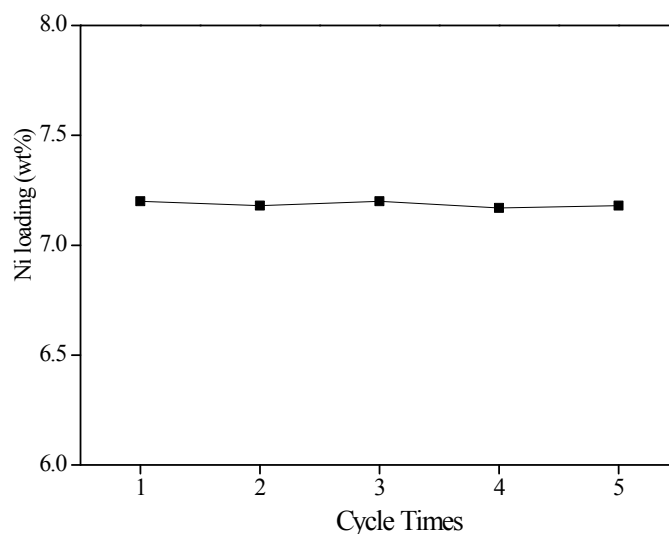

Fig. S6 The Ni loading of Ni-B/MIL-101 for consequent 5 runs
